# Supplementary material
Source: PubMed Central journal article supplement (PMC2766302)
Supplement: NIHMS137035-supplement-Supp_Data.pdf [file NIHMS137035-supplement-Supp_Data.pdf]

# Supporting Information Figure 1

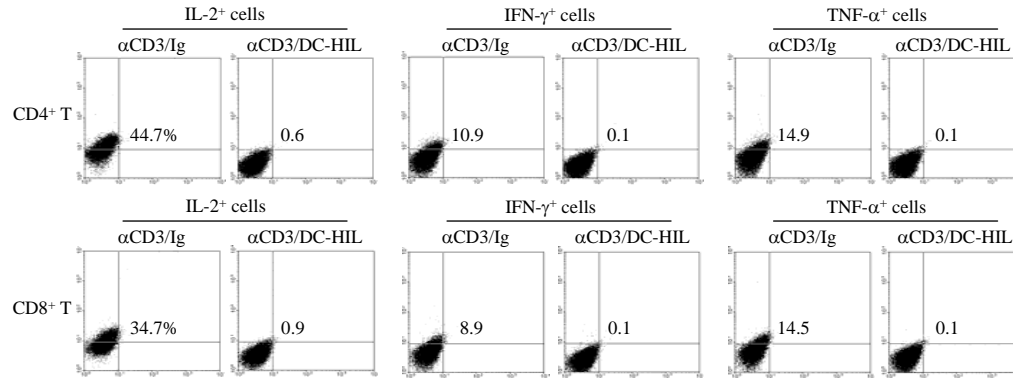

**Supporting Information Figure 1. DC-HIL inhibits cytokine production by activated T cells on a per cell basis.** CD4<sup>+</sup> or CD8<sup>+</sup> T cells ( $2 \times 10^5$  cells/well, in triplicate) purified from PBMCs were cultured for 3 d in microculture wells precoated with anti-CD3 Ab (0.3  $\mu$ g/ml) and DC-HIL-Fc or control Ig (10  $\mu$ g/ml). Cells were harvested from 3 wells, pooled, permeabilized, and then stained with PE-conjugated anti-IL-2, anti-IFN- $\gamma$ , and anti-TNF- $\alpha$ . Numbers in quadrants indicate the percentage of cytokine-positive cells. Data shown are representative of 2 independent experiments.

## Supporting Information Figure 2

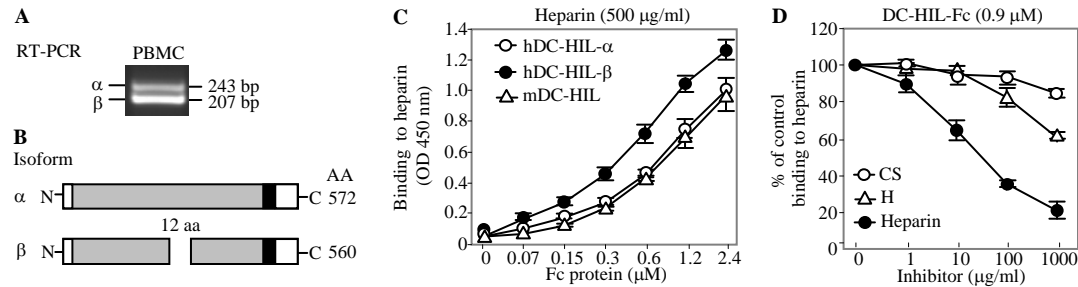

### Supporting Information Figure 2. Human DC-HIL $\alpha$ and $\beta$ isoforms possess heparin-binding activity.

(A) mRNA expression of human DC-HIL was examined by RT-PCR of total RNA prepared from PBMCs. PCR products were size-fractionated through 0.8% agarose gel running. The upper and lower PCR bands correspond to  $\alpha$  (full-length) and  $\beta$  isoforms (truncated form), respectively. (B) A full-length cDNA encoding the  $\beta$  isoform was cloned and sequenced, and deduced amino acid sequence (560 amino acids) was aligned with the  $\alpha$  isoform (572 amino acids) consisting of leader sequence (open), extracellular (gray), transmembrane (black), and intracellular (open) domains. (C) Varying concentrations ( $\mu\text{M}$ ) of mouse DC-HIL-Fc or human DC-HIL-Fc ( $\alpha$  and  $\beta$  isoforms) were incubated in ELISA wells (triplicate) chemically coated with heparin (500  $\mu\text{g}/\text{ml}$ ). After washing, DC-HIL-Fc protein bound to heparin was assayed by ELISA. Specific binding is expressed as  $\text{OD}_{450}$  reading left after subtracting background by control mouse IgG from experimental  $\text{OD}_{450}$ . (D) Binding of human  $\alpha$  isoform (0.9  $\mu\text{M}$ ) to heparin was inhibited by different doses ( $\mu\text{g}/\text{ml}$ ) of CS (chondroitin sulfate), H (heparan sulfate), and heparin. Second set of experiments (for C and D) showed similar results.
